# Supplementary material for: An easy synthesis of 5-functionally substituted ethyl 4-amino-1-aryl- pyrazolo-3-carboxylates: interesting precursors to sildenafil analogues
Source: Beilstein J Org Chem. 2007 May 1;3:15. doi: 10.1186/1860-5397-3-15 (PMC1885264; doi:10.1186/1860-5397-3-15)
Supplement: File 1 — The experimental section. The experimental data and the results of analysis [file Beilstein_J_Org_Chem-03-15-s001.doc]

**Experimental:**

### All melting points were determined on a Stuart melting point apparatus and are uncorrected. The 1H and 13C NMR spectra were recorded at (300 MHz) and (75 MHz) respectively were recorded on Varian Gemini NMR spectrometer. Chemical shifts (δ) are given from TMS (0 ppm) as internal standard for 1H-NMR and 13C-NMR. Mass spectra were measured on a Shimadzu GMMS -QP-1000 EX mass spectrometer at 70 eV. The elemental analyses were performed at the micro analytical center, Cairo University. The IR spectra were recorded in KBr using a FTIR unit Bruker-vector 22 spectrophotometer.

**General method for preparation of Ethyl 4-amino-5-substituted-1-aryl-1*H*-pyrazole-3-carboxylates (4)**

To a solution of **1a-c** (0.1 mol) and triethylamine (20 ml) chloroacetonitriles, ethyl chloroacetate, or phenacyl chloride (0.2 mol) was added. The reaction mixture was the refluxed for 45 minute, and then poured onto ice-cold water and HCl, the solid product so formed was filtered off and crystallized from ethanol to afford **4**.

**Ethyl 4-mino-5-cyano-1-phenyl-1*H*-pyrazole-3-carboxylate (4a)**

Yield 2 g (78 %); m.p: 140-142 oC, 1H MNR (300 MHz, DMSO-d6): δ, ppm: 1.31 (t, 3H, CH3, *J* = 7.2 Hz), 4.35 (q, 2H, CH2, *J* = 7.2 Hz), 6.14 (s, 2H, NH2), 7.52-7.70 (m, 5H, Ar-H); 13C NMR (DMSO-d6): δ, ppm: 14.14, 60.51, 98.83, 111.11, 122.78, 129.12, 129.58, 129.71, 138.02, 144.18, 161.75 ;MS (EI): m/z (%) = 256 (M+); IR (KBr, cm-1): υmax = 3444 and 3349 (NH2), 2219 (CN), 1696 (CO); *Anal*. Calcd. for C13H12N4O2 (256.27): C, 60.93; H, 4.72; N, 21.86. Found: C, 61.27; H, 4.57; N, 21.76.

**Ethyl 4-amino-1-(4-chlorophenyl) -5-cyano-1*H*-pyrazole-3-carboxylate (4b)**

Yield 2.35 g (81 %); m.p: 173-175 oC; 1H MNR (300 MHz, DMSO-d6): δ, ppm: 1.31 (t, 3H, CH3, *J* = 7.2 Hz), 4.33 (q, 2H, CH2, *J* = 7.2 Hz), 6.17 (s, 2H, NH2), 7.67 (d, 2H, Ar-H, *J* = 8.4 Hz), 7.72 (d, 2H, Ar-H, *J* = 8.4 Hz); 13C NMR (DMSO-d6): δ, ppm: 14.1, 60.6, 98.7, 111, 124.4, 129.6, 13, 133.5, 136.8, 144.2, 161.6; MS (EI): m/z (%) = 290 (M+);

IR (KBr, cm-1): υmax = 3488 and 3384 (NH2), 2217 (CN), 1700 (CO); *Anal*. Calcd. for C13H11ClN4O2 (290.71): C, 53.71; H, 3.81; N, 19.27. Found: C, 53.97; H, 4.04; N, 19.11.

**Ethyl 4-amino-5-cyano-1-*p*-tolyl- 1*H*-pyrazole-3-carboxylate (4c)**

Yield 2 g (75 %); m.p: 168-170 oC; 1H MNR (300 MHz, DMSO-d6): δ, ppm: 1.31 (t, 3H, CH3, *J* = 7.2 Hz), 4.32 (q, 2H, CH2, *J* = 7.2 Hz), 6.10 (s, 2H, NH2), 7.38 (d, 2H, Ar-H, *J* = 8.4 Hz),7.56 (d, 2H, Ar-H, *J* = 8.4 Hz); 13C NMR (DMSO-d6): δ, ppm: 14.1, 20.5, 60.4, 98.9, 111.1, 122.6, 129.4, 129.9, 135.7, 138.9, 144.1, 161.8 ;MS (EI): m/z (%) = 270 (M+); IR (KBr, cm-1): υmax = 3440 and 3345 (NH2), 2218 (CN), 1693 (CO); *Anal*. Calcd. for C14H14N4O2 (270.29): C, 62.21; H, 5.22; N, 20.73. Found: C, 62.52; H, 5.09; N, 20.54.

**Diethyl 4-amino-1-(4’-chlorophenyl)-1*H*-pyrazole-3,5-dicarboxylate (4d)**

Yield 2.06 g (61 %); m.p: 138-140 oC; 1H MNR (300 MHz, DMSO-d6): δ, ppm: 1.13 (t, 3H, CH3, *J* = 7.2 Hz), 1.30 (t, 3H, CH3, *J* = 7.2 Hz), 4.16 (q, 2H, CH2, *J* = 7.2 Hz), 4.31 (q, 2H, CH2, *J* = 7.2 Hz), 5.69 (s, 2H, NH2), 7.48-7.56 (m, 4H, Ar-H); 13C NMR (DMSO-d6): δ, ppm: 13.78, 14.6, 60.3, 60.3, 116.3, 127.6, 128.3, 129.0, 133.0, 139.0, 141.2, 158.6, 162.2; MS (EI): m/z (%) = 337 (M+); IR (KBr, cm-1): υmax = 3490 and 3383 (NH2), 1709, 1604 (2 CO); *Anal*. Calcd. for C15H16ClN3O4 (337.77): C, 53.34; H, 4.77; N, 12.44. Found: C, 53.11; H, 4.92; N, 12.14.

**Ethyl 4-amino-5-benzoyl-1-(4’-chlorophenyl)-1*H*-pyrazole-3-carboxylate (4e)**

Yield 2.47 g (67 %); m.p: 138-140 oC; 1H MNR (300 MHz, DMSO-d6): δ, ppm: 1.32 (t, 3H, CH3, *J* = 7.2 Hz), 4.38 (q, 2H, CH2, *J* = 7.2 Hz), 5.85 (s, 2H, NH2), 7.23-7.47 (m, 9H, Ar-H); 13C NMR (DMSO-d6): δ, ppm: 14.2, 60.4, 124.7, 126.3, 128.1, 128.4, 128.52, 129.8, 132, 132.2, 137.5, 138.6, 141.7, 162.2, 185.1 ;MS (EI): m/z (%) = 369 (M+); IR (KBr, cm-1): υmax = 3478 and 3369 (NH2), 1702 (CO); *Anal*. Calcd. for C19H16ClN3O3 (369.81): C, 61.71; H, 4.36; N, 11.36. Found: C, 62.02; H, 4.22; N, 11.37..

**Ethyl7-imino-6-phenyl-1-(4’-chlorophenyl)-5-thioxo-4,5,6,7-tetrahydro-1*H*-pyrazolo[4,3-*d*]pyrimidine-3-carboxylylate (7)**

To a solution of **4b** (0.01 mol) and (20 ml) of pyridine, phenylisothiocyanate (0.1mol) was added. The reaction mixture was then refluxed for 5 hours then cooled to room temperature and poured onto cold water and hydrochloric acid mixture, the solid product so formed was filtered off and crystallized from ethanol to afford **7**.

Yield 3.1 g (73 %); m.p  oC; 1H MNR (300 MHz, DMSO-d6): δ, ppm: 1.35 (t, 3H, CH3, *J* = 7.2 Hz), 4.39 (q, 2H, CH2, *J* = 7.2 Hz), 6.87-7.77 (m, 9H, Ar-H), 8.33 (br s, 1H, NH), 10.3 (br s, 1H, NH); 13C NMR (DMSO-d6): δ, ppm: 14.1, 61.3, 120.6, 121.4, 123, 123.5, 123.8, 126.7, 128.2, 128.5, 133.7, 135.3, 137.5, 146.9, 159.9, 163.1; MS (EI): m/z (%) = 425 (M+); IR (KBr, cm-1): υmax = 3387, 3206 (2 NH), 1744 (CO), 1699 (CS); *Anal*. Calcd. for C20H16ClN5O2S (425.90): C, 56.40; H, 3.79; N, 16.44. Found: C, 56.67; H, 3.93; N, 16.34.

**Ethyl 4-acetylamino--5-cyano-1-(4’-chlorophenyl)-1*H*-pyrazole-3-carboxylate (8)**

### 10 mmol of pyrazole 4b was refluxed in acetic anhydride (20 ml) for 2 h. The solvent was evaporated under vacuum and the crude product was collected and crystallized from ethanol.

Yield 2.6 g (78 %); m.p: 118-120 oC; 1H MNR (300 MHz, DMSO-d6): δ, ppm: 1.28 (t, 3H, CH3, *J* = 7.2 Hz), 2.16 (s, 3H, CH3), 4.33 (q, 2H, CH2, *J* = 7.2 Hz), 7.68 (d, 2H, Ar-H, *J* = 8 Hz), 7.94(d, 2H, Ar-H, *J* = 8 Hz) 10.07 (s, 1H, NH); 13C NMR (DMSO-d6): δ, ppm: 13.9, 25.8, 61.6, 110.4, 116, 125.7, 129.7, 130.6, 134.5, 135.9, 139.9, 160.2, 171.5; MS (EI): m/z (%) = 332 (M+); IR (KBr, cm-1): υmax = 3332 (NH), 2235 (CN), 1725 (COOEt, 1691 (NHCO); *Anal*. Calcd. for C15H13ClN4O3 (332.75): C, 54.15; H, 3.94; N, 16.84. Found: C, 54.35; H, 4.02; N, 16.68.

**Ethyl 4-(dimethylamino-methyleneamino)-5-cyano-1-(4’-chlorophenyl))-1*H*-pyrazole-3-carboxylate (9)**

A mixture of compound **4b** (0.01 mol), and dimethylformamide dimethylacetal (0.01 mol) in dioxan (20 ml) was heated under reflux for 5 hours, then left to cool and poured into water. The solid product obtained was crystallized from ethanol.

Yield 2.8 g (81 %); m.p: 120-122  oC; 1H MNR (300 MHz, DMSO-d6): δ, ppm: 1.25 (t, 3H, CH3, *J* = 7.2 Hz), 2.97 (s, 3H, CH3), 3.05 (s, 3H, CH3), 4.28 (q, 2H, CH3, *J* = 7.2 Hz), 7.67-7.77 (m, 4H, Ar-H), 7.97 (s, 1H, amidine-H); 13C NMR (DMSO-d6): δ, ppm: 13.9, 33.6, 60.5, 107.3, 111.1, 124.4, 129.7, 133.6, 135.1, 136.8, 147.6, 157.7, 160.7 ;MS (EI): m/z (%) = 345 (M+); IR (KBr, cm-1): υmax = 2223 (CN), 1722 (COOEt; *Anal*. Calcd. for C16H16ClN5O2 (345.79): C, 55.58; H, 4.66; N, 20.25. Found: C, 55.63; H, 4.81; N, 20.46.

**Ethyl 7-amino-1-(4’-chlorophenyl)-1*H*-pyrazolo[4,3-*d*]pyrimidine-3-carboxylate (10)**

A mixture of compound **9** (0.01 mol), and ammonium acetate (2g) in acetic acid (20 ml) was heated under reflux for 3 hours, then left to cool and poured onto water. The solid product obtained was crystallized from ethanol.

Yield 2.67 g (84 %); m.p: 190-191 oC; 1H MNR (300 MHz, DMSO-d6): δ, ppm: 1.31 (t, 3H, CH3, *J* = 7.2 Hz), 4.35 (q, 2H, CH2, *J* = 7.2 Hz), 6.80 (s, 2H, NH2), 7.63-7.74 (m, 4H, Ar-H), 8.40 (s, 1H, pyrimidine-H); 13C NMR (DMSO-d6): δ, ppm: 14.2, 60.6, 121.4, 124.4, 127.4, 129.6, 134.1, 137.4, 143.2, 144.2, 153.9, 160.5; MS (EI): m/z (%) = 317 (M+); IR (KBr, cm-1): υmax = 3396 and 3321 (NH2), 1715 (CO); *Anal*. Calcd. for C14H12ClN5O2 (317.74): C, 52.92; H, 3.81; N, 22.04. Found: C, 53.13; H, 3.73; N, 22.23..

**General method for preparation of (N-Hydroxycarbamidoyl)-(4’chlorophenylhydrazono)- acetate (11)**

### A mixture of arylhydrazononitriles 1 (10 mmol), and hydroxyl amine hydrochloride was refluxed in ethanol (20 ml) in presence of sodiumacetate for 2 h. The solvent was evaporated under vacuum and the crude product was collected and crystallized from ethanol /Dioxan.

**(*N*-Hydroxycarbamimidoyl)-(phenylhydrazono)acetic acid ethyl ester (11a)**

Yield 2.0 g (80 %); m.p: 208-210  oC; 1H MNR (300 MHz, DMSO-d6): δ, ppm: 1.29 (t, 3H, CH3, *J* = 7.2 Hz) 4.25 (q, 2H, CH2, *J* = 7.2 Hz), 6.43 (s, 2H, NH2), 7.04-7.72 (m, 4H, Ar-H), 10.23 (s, 1H, OH), 13.36 (s, 1H, NH); MS (EI): m/z (%) = 250 (M+); IR (KBr, cm-1): υmax = 3465 and 3358 (NH2), 3032 (br OH); *Anal*. Calcd. for C11H14N4O3 (250.26): C, 52.79; H, 5.64; N, 22.39. Found: C, 52.23; H, 5.44; N, 22.45.

**[(4-Chlorophenyl)hydrazono)](*N*-Hydroxycarbamimidoyl)-acetic acid ethyl ester (11b)**

Yield 2.33 g (82 %); m.p: 212-213 oC; 1H MNR (300 MHz, DMSO-d6): δ, ppm: 1.28 (t, 3H, CH3, *J* = 7.2 Hz) 4.32 (q, 2H, CH2, *J* = 7.2 Hz), 6.58 (s, 2H, NH2), 6.98-7.96 (m, 4H, Ar-H), 12.4 (s, 1H, OH), 13.46 (s, 1H, NH); MS (EI): m/z (%) = 284 (M+); IR (KBr, cm-1): υmax = 3473 and 3360 (NH2), 3036 (br OH), 1693 (CO); *Anal*. Calcd. for C11H13ClN4O3 (284.70): C, 46.41; H, 4.60; N, 19.68. Found: C, 46.52; H, 4.46; N, 19.73.

**General method for preparation of 3-Amino-4-arylhydrazono-4*H*-isoxazol-5-ones (13)**

### A mixture of arylhydrazononitriles 1 (10 mmol), and hydroxyl amine hydrochloride was refluxed in DMF (20 ml) in presence of anhydrous sodiumacetate (2g) for 8 h. The solvent was evaporated under vacuum and the crude product was collected and crystallized from acetic acid.

**3-Amino-4-(phenylhydrazono)-4*H*-isoxazol-5-one (13a)**

Yield 1.57 g (77 %); m.p: 192-194 oC; 1H MNR (300 MHz, DMSO-d6): δ, ppm: 6.43 (s, 2H, NH2), 7.06-7.72 (m, 5H, Ar-H), 12.44 (s, 1H, NH); 13C NMR (DMSO-d6): δ, ppm: 115.20, 115.89, 116.30, 125.34, 129.22, 141.69, 158.95, 162.34; MS (EI): m/z (%) = 204 (M+); IR (KBr, cm-1): υmax = 3432 (NH), 3335 and 3265 (NH2), 1685 (CO); *Anal*. Calcd. for C9H8N4O2 (204.19): C, 52.94; H, 3.95; N, 27.44. Found: C, 52.78; H, 3.73; N, 27.72.

**3-Amino-4-[(4’-chlorophenyl)hydrazono]-4*H*-isoxazol-5-one (13b)**

Yield 1.62 g (68 %); m.p: 240-242 oC; 1H MNR (300 MHz, DMSO-d6): δ, ppm: 7.38-8.26 (m, 4H, Ar-H), 23.48 (s, 2H, NH2), 15.81 (s, 1H, NH); MS (EI): m/z (%) = 238 (M+); IR (KBr, cm-1): υmax = 3478 (NH), 3346 and 3258 (NH2), 1697 (CO); *Anal*. Calcd. for C9H7ClN4O2 (238.63): C, 45.30; H, 2.96; N, 23.48. Found: C, 45.47; H, 3.12; N, 23.32.
